# Supplementary material for: Location and functions of Inebriated in the Drosophila eye
Source: PubMed Central journal article supplement (PMC6078345; doi:10.1242/bio.034926), 2018-07-15
Supplement: biolopen-7-034926-s1.pdf [file biolopen-7-034926-s1.pdf]

## **Supplementary Data S1.** Xenopus electrophysiology data

[Click here to Supplementary Data S1](#)
